# Supplementary material for: Genome-wide identification and characterization of the Populus WRKY transcription factor family and analysis of their expression in response to biotic and abiotic stresses
Source: PubMed Central journal article supplement (PMC4246191; doi:10.1093/jxb/eru381), 2014-09-23
Supplement: supp_eru381_jexbot130336_file001.pdf [file supp_eru381_jexbot130336_file001.pdf]

**Genome-wide identification and characterization of the *Populus* WRKY transcription factor family and analysis of their expression in response to biotic and abiotic stresses**

**Authors:**

Yuanzhong Jiang<sup>1</sup>, Yanjiao Duan<sup>1</sup>, Jia Yin<sup>3</sup>, Shenglong Ye<sup>1</sup>, Faqi Zhang<sup>3</sup>, Wanxiang Lu<sup>2</sup>,  
Di Fan<sup>1</sup>, Keming Luo\*<sup>1,3</sup>

---

<sup>1</sup>Key Laboratory of Eco-environments of Three Gorges Reservoir Region, Ministry of Education, Chongqing Key Laboratory of Transgenic Plant and Safety Control, Institute of Resources Botany, School of Life Sciences, Southwest University, Chongqing 400715, China

<sup>2</sup>College of Horticulture and Landscape Architecture, Southwest University, Chongqing, 400716, China

<sup>3</sup>Key Laboratory of Adaptation and Evolution of Plateau Biota, Northwest Institute of Plateau Biology, Chinese Academy of Sciences, 810008 Xining, China

\*Corresponding author (kemingl@swu.edu.cn).

Address: No. 1, Tiansheng Road, Beibei, Chongqing 400715, China.

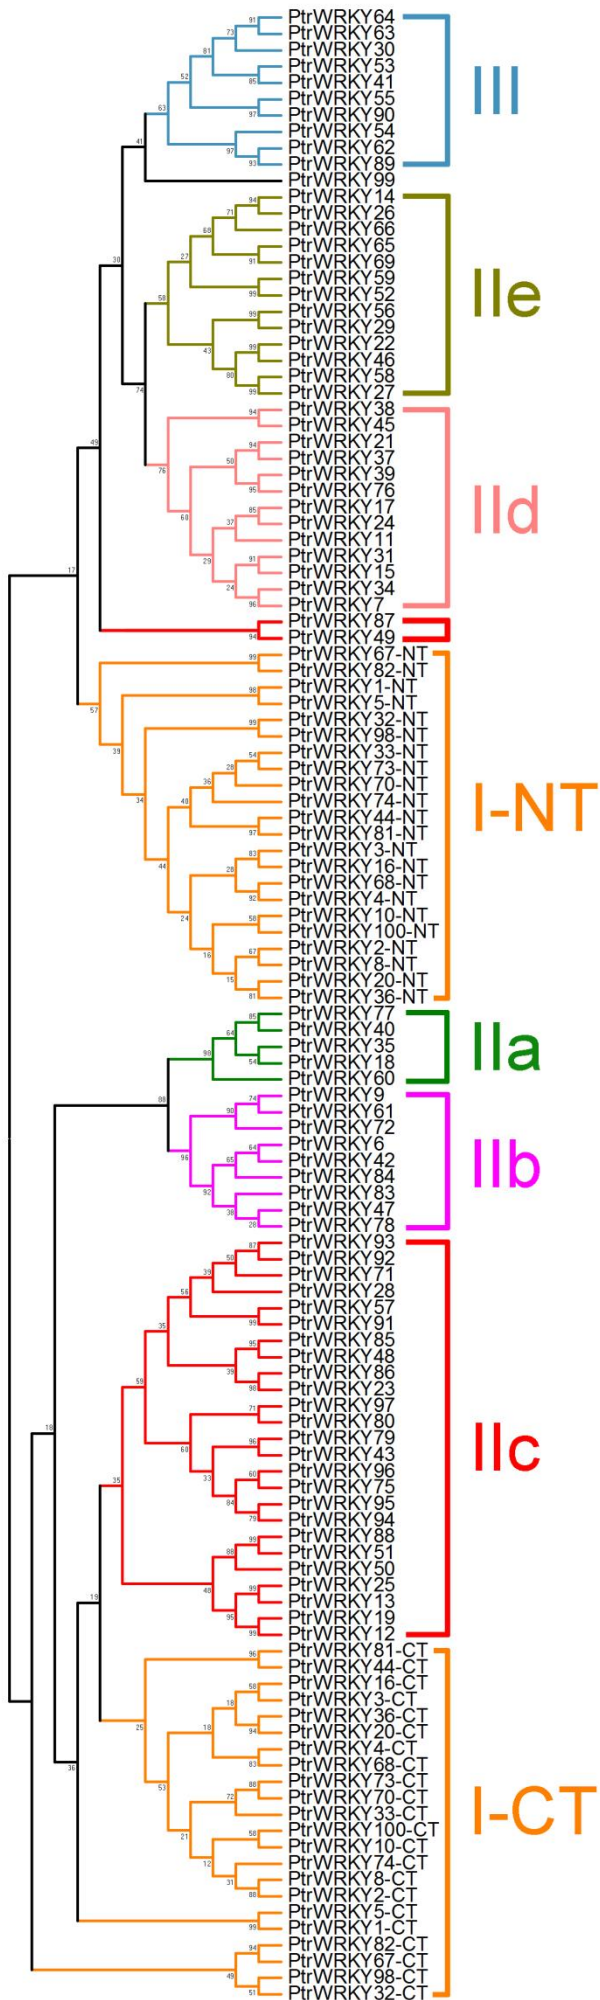

**Supplementary Fig. S1.** Phylogenetic analyses of *Populus* WRKY domains. The majority rule consensus phylogenetic unrooted tree was reconstructed based on the sequences 122 *Populus* WRKY domains using the MEGA 4.0 program by the Neighbor-Joining (NJ) method with 1,000 bootstrap replicates. Group I-NT and -CT domains (orange); group IIa domains (green); group IIb domains (purple), group IIc domains (red); group IId domains (pink); group IIe domains (khaki); sole domain (black); group III domains (mauve).



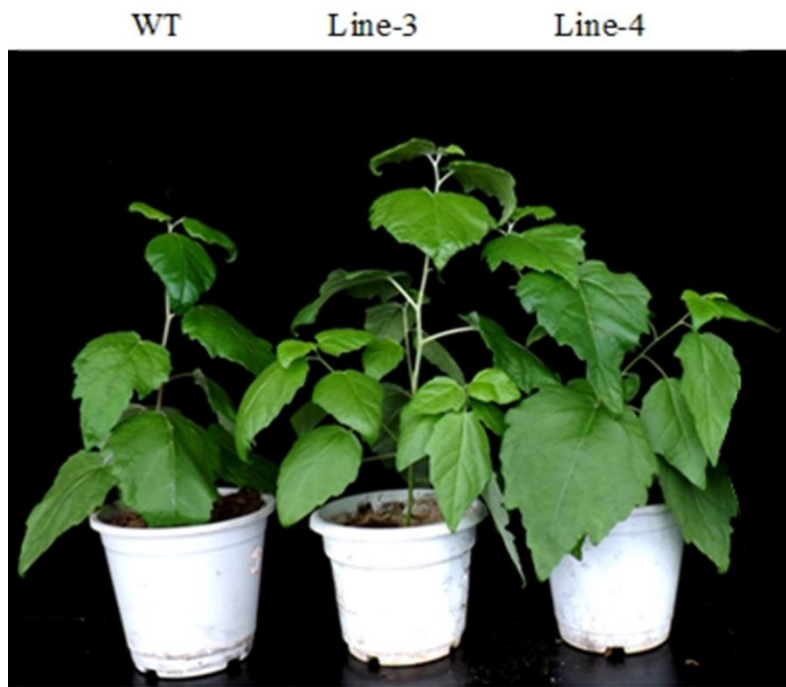

**Supplementary Fig. S3.** Transgenic *Populus tomentosa* Carr. plants overexpressing *PtrWRKY89*. No phenotypic or growth differences were observed between *PtrWRKY89* overexpressors and control plants under the same growth conditions.

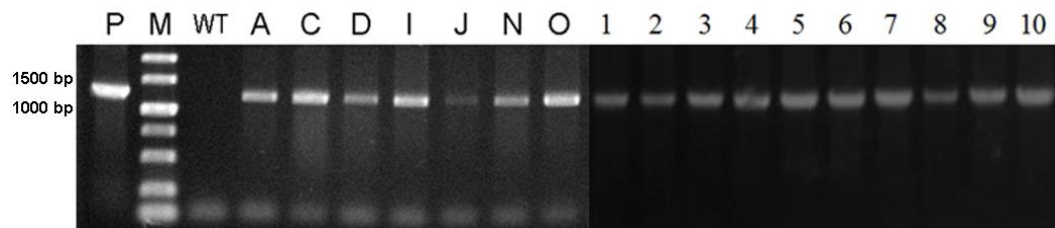

**Supplementary Fig. S4.** PCR analysis of transgenic poplar plants. Genomic DNAs were isolated from hygromycin-resistant plants transformed with the 35S:*PtrWRKY89* vector. PCR amplification used primers specific for the production of a 1202-bp *PtrWRKY89* fragment combining T-NOS terminal region. M, D2000 DNA Ladder; WT, non-transgenic plants; P, corresponding plasmid DNA (positive control); Numbers on the left indicate DNA marker sizes in base pairs.

Supplemental Table S1. WRKY gene family in *Populus*

| common name | sequence ID VISION<br>3.0 | common name<br>(He et al., 2012) | sequence ID (VISION<br>2.0) | accession number | AtWRKY<br>homologue | length(aa) |
|-------------|---------------------------|----------------------------------|-----------------------------|------------------|---------------------|------------|
| PtrWRKY1    | Potri.014G164300          | PtWRKY2                          | POPTR_0014s16220.1          | ERP53352.1       | 1                   | 485        |
| PtrWRKY2    | Potri.011G169300          | PtWRKY37                         | POPTR_0011s17230.1          | XP_002330532     | 2                   | 725        |
| PtrWRKY3    | Potri.008G091900          | PtWRKY69                         | POPTR_0008s09140.1          | XP_002312267     | 3                   | 492        |
| PtrWRKY4    | Potri.017G088300          | PtWRKY87                         | POPTR_0017s12430.1          | EEF04212.1       | 58                  | 453        |
| PtrWRKY5    | Potri.002G221600          | PtWRKY54                         | POPTR_0002s22180.1          | XP_002302839     | 1                   | 316        |
| PtrWRKY6    | Potri.004G007500          | PtWRKY28                         | POPTR_0004s00890.1          | XP_002331543     | 42                  | 578        |
| PtrWRKY7    | Potri.002G123300          | PtWRKY14                         | POPTR_0002s12480.1          | XP_002301166     | 15                  | 358        |
| PtrWRKY8    | Potri.001G472800          | PtWRKY101                        | POPTR_0001s47670.1          | XP_002300596     | 2                   | 731        |
| PtrWRKY9    | Potri.001G208600          | PtWRKY42                         | POPTR_0001s21580.1          | XP_002298189     | 9                   | 519        |
| PtrWRKY10   | Potri.019G053900          | PtWRKY92                         | POPTR_0019s08110.1          | ERP49067.1       | 25                  | 501        |
| PtrWRKY11   | Potri.018G008500          | PtWRKY24                         | POPTR_0018s03450.1          | XP_002324382     | 11/17               | 338        |
| PtrWRKY12   | Potri.002G138900          | PtWRKY48                         | POPTR_0002s13980.1          | EEE80510.2       | 12                  | 203        |
| PtrWRKY13   | Potri.005G086400          | PtWRKY10                         | POPTR_0005s08860.1          | ABK93467.1       | 13                  | 164        |
| PtrWRKY14   | Potri.001G460600          | PtWRKY45                         | POPTR_0001s46490.1          | XP_002299016     | 35                  | 423        |
| PtrWRKY15   | Potri.005G141400          | PtWRKY20                         | POPTR_0005s18490.1          | ERP61327.1       | 7                   | 331        |
| PtrWRKY16   | Potri.010G163000          | PtWRKY72                         | POPTR_0010s17040.1          | XP_002315024     | 3/4                 | 499        |
| PtrWRKY17   | Potri.006G072400          | PtWRKY7                          | POPTR_0006s07170.1          | XP_002308998     | 11/17               | 301        |
| PtrWRKY18   | Potri.006G263600          | PtWRKY9                          | POPTR_0006s27950.1          | XP_002308704     | 18/60               | 320        |
| PtrWRKY19   | Potri.014G050000          | PtWRKY95                         | POPTR_0014s04890.1          | XP_002327027     | 12                  | 175        |
| PtrWRKY20   | Potri.011G087900          | PtWRKY73                         | POPTR_0011s09030.1          | EEE97371.2       | 20                  | 395        |
| PtrWRKY21   | Potri.005G219500          | PtWRKY63                         | POPTR_0005s24100.1          | XP_002306823     | 21                  | 347        |
| PtrWRKY22   | Potri.002G164400          | PtWRKY49                         | POPTR_0002s16590.1          | ERP64413.1       | 22                  | 409        |
| PtrWRKY23   | Potri.014G118200          | PtWRKY33                         | POPTR_0014s11350.1          | XP_002320967     | 23                  | 290        |
| PtrWRKY24   | Potri.018G139300          | PtWRKY91                         | POPTR_0018s13600.1          | XP_002325248     | 11/17               | 300        |
| PtrWRKY25   | Potri.007G078200          | PtWRKY68                         | POPTR_0007s06930.1          | XP_002310044     | 13                  | 233        |
| PtrWRKY26   | Potri.011G157100          | PtWRKY74                         | POPTR_0011s16050.1          | XP_002317080     | 14                  | 450        |
| PtrWRKY27   | Potri.017G149000          | PtWRKY96                         | POPTR_0017s00960.1          | XP_002327503     | 27                  | 412        |
| PtrWRKY28   | Potri.002G059100          | PtWRKY47                         | POPTR_0002s06000.1          | XP_002302140     | N/A                 | 325        |
| PtrWRKY29   | Potri.001G099000          | PtWRKY41                         | POPTR_0001s09900.1          | ERP65337.1       | 29                  | 325        |
| PtrWRKY30   | Potri.012G031700          | PtWRKY27                         | POPTR_0012s01380.1          | XP_002318373     | 30                  | 371        |
| PtrWRKY31   | Potri.007G047400          | PtWRKY26                         | POPTR_0007s10670.1          | XP_002310122     | 7                   | 335        |
| PtrWRKY32   | Potri.018G107000          | PtWRKY30                         | POPTR_0018s11630.1          | EEF03700.1       | 32                  | 427        |
| PtrWRKY33   | Potri.016G128300          | PtWRKY17                         | POPTR_0016s13600.1          | XP_002323637     | 33                  | 579        |
| PtrWRKY34   | Potri.014G024200          | PtWRKY94                         | POPTR_0014s02420.1          | ERP52684.1       | 15                  | 388        |
| PtrWRKY35   | Potri.018G019800          | PtWRKY89                         | POPTR_0018s02470.1          | XP_002324327     | 18/60               | 320        |
| PtrWRKY36   | Potri.001G361600          | PtWRKY44                         | POPTR_0001s37260.1          | XP_002298853     | 20                  | 557        |
| PtrWRKY37   | Potri.002G043500          | PtWRKY46                         | POPTR_0002s04440.1          | XP_002302070     | 21                  | 351        |
| PtrWRKY38   | Potri.003G111900          | PtWRKY55                         | POPTR_0003s11120.1          | XP_002304424     | N/A                 | 310        |
| PtrWRKY39   | Potri.005G055300          | PtWRKY98                         | POPTR_0005s05700.1          | XP_002328486     | 39/74               | 353        |
| PtrWRKY40   | Potri.001G044500          | PtWRKY88                         | POPTR_0001s03620.1          | XP_002332076     | 40                  | 318        |
| PtrWRKY41   | Potri.001G092900          | PtWRKY12                         | POPTR_0001s10490.1          | XP_002297983     | 41/53               | 338        |
| PtrWRKY42   | Potri.014G111900          | PtWRKY79                         | POPTR_0014s10750.1          | XP_002320254     | 42                  | 502        |
| PtrWRKY43   | Potri.014G090700          | PtWRKY19                         | POPTR_0014s08640.1          | EEE98475.2       | 43                  | 117        |

|          |                  |           |                    |              |       |     |
|----------|------------------|-----------|--------------------|--------------|-------|-----|
| PtWRKY44 | Potri.006G133200 | PtWRKY93  | POPTR_0006s13550.1 | XP_002326326 | 26    | 475 |
| PtWRKY45 | Potri.001G121300 | PtWRKY22  | POPTR_0001s00350.1 | EEE82428.2   | N/A   | 314 |
| PtWRKY46 | Potri.014G090300 | PtWRKY78  | POPTR_0014s08600.1 | ERP53148.1   | 22    | 349 |
| PtWRKY47 | Potri.002G228400 | PtWRKY53  | POPTR_0002s21330.1 | XP_002302873 | 6/31  | 613 |
| PtWRKY48 | Potri.008G103300 | PtWRKY70  | POPTR_0008s10280.1 | EEE89685.2   | 48    | 368 |
| PtWRKY49 | Potri.006G087000 | PtWRKY32  | POPTR_0006s08730.1 | EEE92589.2   | 49    | 304 |
| PtWRKY50 | Potri.006G224100 | PtWRKY67  | POPTR_0006s24050.1 | XP_002308538 | 50    | 165 |
| PtWRKY51 | Potri.005G085200 | PtWRKY61  | POPTR_0005s08720.1 | XP_002307134 | 51    | 204 |
| PtWRKY52 | Potri.014G119800 | PtWRKY80  | POPTR_0014s11490.1 | XP_002320972 |       | 262 |
| PtWRKY53 | Potri.003G138600 | PtWRKY21  | POPTR_0003s13840.1 | XP_002304549 | 41/53 | 342 |
| PtWRKY54 | Potri.013G090300 | PtWRKY77  | POPTR_0013s09470.1 | XP_002319879 | 54/70 | 324 |
| PtWRKY55 | Potri.019G059300 | PtWRKY36  | POPTR_0019s08730.1 | EEE99872.2   | 55    | 351 |
| PtWRKY56 | Potri.003G132700 | PtWRKY56  | POPTR_0003s13250.1 | XP_002303610 | 29    | 330 |
| PtWRKY57 | Potri.010G160100 | PtWRKY71  | POPTR_0010s16760.1 | EEF02268.2   | 57    | 293 |
| PtWRKY58 | Potri.004G072000 | PtWRKY59  | POPTR_0004s07050.1 | EEE85782.2   | 27    | 418 |
| PtWRKY59 | Potri.002G195300 | PtWRKY3   | POPTR_0002s19630.1 | EEE80787.2   | N/A   | 245 |
| PtWRKY60 | Potri.018G019700 | PtWRKY38  | POPTR_0018s02480.1 | XP_002324328 |       | 271 |
| PtWRKY61 | Potri.015G064100 | PtWRKY99  | POPTR_0015s07530.1 | XP_002330089 | 9     | 565 |
| PtWRKY62 | Potri.016G137900 | PtWRKY85  | POPTR_0016s14490.1 | XP_002323675 | 54/70 | 321 |
| PtWRKY63 | Potri.002G168700 | PtWRKY51  | POPTR_0002s17010.1 | XP_002302620 | 30    | 363 |
| PtWRKY64 | Potri.014G096200 | PtWRKY6   | POPTR_0014s09190.1 | XP_002320852 | 30    | 365 |
| PtWRKY65 | Potri.011G070100 | PtWRKY8   | POPTR_0011s06990.1 | XP_002317397 | 69    | 268 |
| PtWRKY66 | Potri.017G104800 | N/A       | POPTR_0017s14630.1 | KJ569571     | 35    | 237 |
| PtWRKY67 | Potri.006G264000 | PtWRKY15  | POPTR_0006s27990.1 | ERP59906.1   | 32    | 267 |
| PtWRKY68 | Potri.004G120800 | PtWRKY60  | POPTR_0004s12000.1 | XP_002306024 | 58    | 482 |
| PtWRKY69 | Potri.004G060900 | PtWRKY58  | POPTR_0004s05920.1 | XP_002305730 | 69    | 262 |
| PtWRKY70 | Potri.019G123500 | PtWRKY4   | POPTR_0019s14460.1 | XP_002326093 | 33    | 599 |
| PtWRKY71 | Potri.005G203200 | PtWRKY62  | POPTR_0005s22480.1 | XP_002306743 | 71    | 322 |
| PtWRKY72 | Potri.017G079500 | PtWRKY86  | POPTR_0017s11570.1 | XP_002323839 | 72    | 538 |
| PtWRKY73 | Potri.013G153400 | PtWRKY1   | POPTR_0013s14960.1 | XP_002319959 | 33    | 591 |
| PtWRKY74 | Potri.006G105300 | PtWRKY64  | POPTR_0006s10600.1 | ERP59048.1   | 26    | 561 |
| PtWRKY75 | Potri.T043800    | PtWRKY97  | POPTR_0017s09750.1 | ERP51013.1   | 75    | 186 |
| PtWRKY76 | Potri.013G042600 | PtWRKY25  | POPTR_0013s03990.1 | EEE95005.2   | 39/74 | 354 |
| PtWRKY77 | Potri.003G182200 | PtWRKY5   | POPTR_0003s18060.1 | EEE78831.2   | 40    | 316 |
| PtWRKY78 | Potri.011G007800 | PtWRKY100 | POPTR_0021s00280.1 | XP_002317127 | 42    | 590 |
| PtWRKY79 | Potri.002G164900 | PtWRKY50  | POPTR_0002s16640.1 | EEE80650.2   | 43    | 125 |
| PtWRKY80 | Potri.015G099200 | PtWRKY82  | POPTR_0015s11130.1 | XP_002322274 | 56/24 | 178 |
| PtWRKY81 | Potri.016G083600 | PtWRKY84  | POPTR_0016s08440.1 | ERP51650.1   | 26    | 382 |
| PtWRKY82 | Potri.018G019000 | PtWRKY90  | POPTR_0018s02550.1 | EEF02898.1   | 32    | 271 |
| PtWRKY83 | Potri.014G155100 | PtWRKY81  | POPTR_0014s15320.1 | XP_002321134 | 6/31  | 624 |
| PtWRKY84 | Potri.002G186600 | PtWRKY52  | POPTR_0002s18770.1 | XP_002302808 | N/A   | 506 |
| PtWRKY85 | Potri.010G147700 | PtWRKY31  | POPTR_0010s15750.1 | EEF01133.2   | 48    | 374 |
| PtWRKY86 | Potri.002G193000 | PtWRKY13  | POPTR_0002s19390.1 | EEE80797.2   | 23    | 318 |
| PtWRKY87 | Potri.016G099900 | PtWRKY34  | POPTR_0016s10610.1 | XP_002323509 | 49    | 309 |
| PtWRKY88 | Potri.007G079800 | PtWRKY16  | POPTR_0007s06720.1 | XP_002310610 | 51    | 190 |
| PtWRKY89 | Potri.006G109100 | PtWRKY65  | POPTR_0006s10950.1 | XP_002309186 | 54/70 | 333 |

|            |                  |           |                    |              |       |     |
|------------|------------------|-----------|--------------------|--------------|-------|-----|
| PtrWRKY90  | Potri.013G090400 | PtWRKY76  | POPTR_0013s09460.1 | EEE95268.2   | 55    | 349 |
| PtrWRKY91  | Potri.008G094000 | PtWRKY11  | POPTR_0008s09360.1 | EEE88696.2   | 57    | 293 |
| PtrWRKY92  | Potri.011G079300 | PtWRKY103 | POPTR_0011s02790.1 | ERP55043.1   | 71    | 331 |
| PtrWRKY93  | Potri.001G352400 | PtWRKY29  | POPTR_0001s34520.1 | ERP66462.1   | 71    | 312 |
| PtrWRKY94  | Potri.001G058800 | PtWRKY40  | POPTR_0001s13600.1 | XP_002299321 | 75    | 104 |
| PtrWRKY95  | Potri.003G169100 | PtWRKY18  | POPTR_0003s16750.1 | EEE79720.2   | 75    | 157 |
| PtrWRKY96  | Potri.001G328000 | PtWRKY43  | POPTR_0001s33560.1 | EEE84925.2   | 75    | 186 |
| PtrWRKY97  | Potri.012G101000 | PtWRKY75  | POPTR_0012s10290.1 | XP_002318747 | 56/24 | 186 |
| PtrWRKY98  | Potri.006G184800 | PtWRKY66  | POPTR_0006s19850.1 | ERP59684.1   | 32    | 345 |
| PtrWRKY99  | Potri.001G002400 | PtWRKY39  | POPTR_0001s03970.1 | ERP65099.1   | N/A   | 135 |
| PtrWRKY100 | Potri.013G086000 | PtWRKY35  | POPTR_0013s08380.1 | XP_002328969 | 25    | 536 |
|            |                  | PtWRKY23  | POPTR_0014s08600.2 | XP_002320158 | 22    | 322 |
|            |                  | PtWRKY57  | POPTR_0003s20860.1 | XP_002303982 | N/A   | 116 |
|            |                  | PtWRKY83  | POPTR_0015s11130.2 | N/A          | 56/24 | 125 |
|            |                  | PtWRKY102 | POPTR_0001s47670.2 | N/A          | 2     | 724 |
|            |                  | PtWRKY104 | POPTR_0810s00200.1 | N/A          | 71    | 319 |

**Supplementary Table S1.** The common names and the gene IDs of putative PtrWRKYs in different versions of Phytozome. The nomenclature by He et al (2009) was also listed. Additionally, The putative orthologs in Arabidopsis of their respective WRKY domain sequences, the accession numbers in GenBank and the length of protein were shown (He et al., 2009). N/A presented not available

| Supplemental Table S2. Accession Numbers of WRKYs from Different Species |                  |
|--------------------------------------------------------------------------|------------------|
| name                                                                     | accession number |
| CaWRKY2                                                                  | DQ402421         |
| OsWRKY71                                                                 | AB190817         |
| TcWRKY53                                                                 | ABN79278         |
| TaWRKY10                                                                 | EU665439         |
| TaWRKY11                                                                 | EU665440         |
| TaWRKY13                                                                 | EU665426         |
| GmWRKY13                                                                 | NP_001237376     |
| GmWRKY54                                                                 | NP_001237438     |
| TaWRKY19                                                                 | EU665430         |
| TaWRKY17                                                                 | EU665429         |
| TaWRKY2                                                                  | EU665425         |
| TaWRKY14                                                                 | EU665427         |
| TaWRKY27                                                                 | EU665431         |
| GmWRKY21                                                                 | NP_001237327     |
| OsWRKY33                                                                 | AAF23898         |
| TaWRKY1                                                                  | EU665424         |
| PtWRKY23                                                                 | EF051079         |
| CaWRKY1                                                                  | AAX20040         |
| HvWRKY1                                                                  | AAS48544         |
| HvWRKY2                                                                  | CAH68818         |
| NtWRKY1                                                                  | AB022693         |
| HvWRKY38                                                                 | AY541586         |
| LtWRKY21                                                                 | AY792618         |
| OsWRKY28                                                                 | DAA05093         |
| OsWRKY30                                                                 | HM153428         |
| VvWRKY2                                                                  | AY596466         |
| MtSTP                                                                    | HM622066         |

**Supplementary Table S2.** Common names of WRKYs from different species and their accession numbers in GenBank.



| Supplemental Table S3. Primers for quantitative real-time RT-PCR (qRT-PCR) and semi-qRT-PCR |                             |                              |
|---------------------------------------------------------------------------------------------|-----------------------------|------------------------------|
| For Gene                                                                                    | F                           | R                            |
| <i>PtrWRKY1</i>                                                                             | 5'-GGTGTTGAAGAAAGTCATG-3'   | 5'-GAGTAGAGCTGTCATTACA-3'    |
| <i>PtrWRKY2</i>                                                                             | 5'-AATCCATCTTCCTCGGTA-3'    | 5'-CAACTTTCCTTCTCTTGG-3'     |
| <i>PtrWRKY3</i>                                                                             | 5'-TGAGGGCTTTGGAATGAT-3'    | 5'-AGGTCAAAAAGTGTGTCG-3'     |
| <i>PtrWRKY4</i>                                                                             | 5'-AAGAGAAGGCAATGCAGG-3'    | 5'-AGCAGCAGGGACATCATG-3'     |
| <i>PtrWRKY5</i>                                                                             | 5'-GACCTGTCCACTGTTGAA-3'    | 5'-AGTAGCTCCTGGGATTTG-3'     |
| <i>PtrWRKY6</i>                                                                             | 5'-ATTGCCTCAGGTTTTTGGTC-3'  | 5'-ATTTGGGGTTGAGCTTGGTG-3'   |
| <i>PtrWRKY7</i>                                                                             | 5'-CTCTTCTTCTGGTCGCTG-3'    | 5'-ACATCCTCTCACGCTGCT-3'     |
| <i>PtrWRKY11</i>                                                                            | 5'-AGGGTTCAGCAATAAGTTC-3'   | 5'-TCATCTGTTGCTCTCTCCAC-3'   |
| <i>PtrWRKY15</i>                                                                            | 5'-TTCCAGCAATCAGCTTGA-3'    | 5'-GTAGTAACCTCTTGGATG-3'     |
| <i>PtrWRKY16</i>                                                                            | 5'-TCTCCTCAGGGCTTTGGAA-3'   | 5'-AAGGTCAAGACATTGCCG-3'     |
| <i>PtrWRKY17</i>                                                                            | 5'-GGAAGCTGTCATTGCTCC-3'    | 5'-CCTCTTGGGTATGGTGAG-3'     |
| <i>PtrWRKY18</i>                                                                            | 5'-TTATGAAGGAGAGCACAAACC-3' | 5'-TTCTGATGGATGATGGACTG-3'   |
| <i>PtrWRKY20</i>                                                                            | 5'-GATCATCCTAAACCTCAACC-3'  | 5'-CATCCAACCTCCTGCTTC-3'     |
| <i>PtrWRKY21</i>                                                                            | 5'-GTCCTTGAGTATTGATGG-3'    | 5'-ACCCTATGTTTCCTCTTC-3'     |
| <i>PtrWRKY22</i>                                                                            | 5'-TCTCACACACCTCGATCC-3'    | 5'-CTCTGCTGTGTACGTCAC-3'     |
| <i>PtrWRKY24</i>                                                                            | 5'-AAAGAAGGAAATCAAGGGTG-3'  | 5'-TAGGGGAGCATGTGAGTG-3'     |
| <i>PtrWRKY28</i>                                                                            | 5'-TCGACATCAATAGGGCAGAG-3'  | 5'-CCATAATCAGGAGAATAGAGC-3'  |
| <i>PtrWRKY30</i>                                                                            | 5'-AAGAAAGAGCATGCCGAGA-3'   | GAGAGGAAGCAAATTAGAGG         |
| <i>PtrWRKY31</i>                                                                            | 5'-CCTCCTTTATCTACATCTTC-3'  | 5'-CATCTTTCTGCTTTTCTTGG-3'   |
| <i>PtrWRKY32</i>                                                                            | 5'-GAAGGGAAACTTAGAATGC-3'   | 5'-ATAGTTCCTGGGATGAGG-3'     |
| <i>PtrWRKY33</i>                                                                            | 5'-TCTAATGGTCTTGCATCTCC-3'  | 5'-GGATTGAAAGAAGGATGATG-3'   |
| <i>PtrWRKY35</i>                                                                            | 5'-TTATGAAGGAGAGCACAAACC-3' | 5'-CAAATCAAGGGTCACAGTAG-3'   |
| <i>PtrWRKY36</i>                                                                            | 5'-CTTCATCTCTGCCTAACC-3'    | 5'-AGCATCCAACCTCCTTCT-3'     |
| <i>PtrWRKY40</i>                                                                            | 5'-GTCAAGAAGAAGGTTCAAAGG-3' | 5'-GTGAGGTCGAGAGTAATATTG-3'  |
| <i>PtrWRKY41</i>                                                                            | 5'-CAAAGAAGAGAAAGACCAC-3'   | 5'-TTCCATGAGCACAAAGAGT-3'    |
| <i>PtrWRKY42</i>                                                                            | 5'-GCATAAACACCGGATTG-3'     | 5'-TCCCCTTCTGCTCTATC-3'      |
| <i>PtrWRKY47</i>                                                                            | 5'-GCTGACAAGAAACATGATGT-3'  | 5'-CAGAAGTCTAGCTCACTCT-3'    |
| <i>PtrWRKY48</i>                                                                            | 5'-AGATCAAGAGGAAGAGCAG-3'   | 5'-GTGCAACGATAATAACTCC-3'    |
| <i>PtrWRKY49</i>                                                                            | 5'-AACAAGCCCAAGGACTCG-3'    | 5'-GAACGGTAAGATGAAGATGAGG-3' |
| <i>PtrWRKY50</i>                                                                            | 5'-AAGTGGTGGAGAGGGTGAAG-3'  | 5'-TAGTAATTCCTCGGGTTTGG-3'   |
| <i>PtrWRKY51</i>                                                                            | 5'-GCATGCAAAATGGAGTGAAG-3'  | 5'-TAGTTATCACATAAGCCGAG-3'   |
| <i>PtrWRKY52</i>                                                                            | 5'-CAAATCAGAAGAGAACAATG-3'  | 5'-AAGAAGGGACAACAGGAATC-3'   |
| <i>PtrWRKY53</i>                                                                            | 5'-CAAAGAAGAGAAAGACCAC-3'   | 5'-GTGATCTCAAATATGGTGG-3'    |
| <i>PtrWRKY54</i>                                                                            | 5'-AGTTACTTTAGGTGTTCTCG-3'  | 5'-AGAAGTATCACACTACTCG-3'    |
| <i>PtrWRKY59</i>                                                                            | 5'-AAGAAGGAAGGTGGTTGAG-3'   | 5'-GGATGGTTGTGATTTGAGG-3'    |
| <i>PtrWRKY60</i>                                                                            | 5'-GTCAAGAAGAAGGTCCAAAG-3'  | 5'-TGATGAGGTATGTGGAGAAC-3'   |
| <i>PtrWRKY61</i>                                                                            | 5'-GGAAACAGGTACAAAGATG-3'   | 5'-GAAGATGACAGTGAAGAG-3'     |
| <i>PtrWRKY62</i>                                                                            | 5'-TCGAACAAGCCAAGCAACTC-3'  | 5'-CATGATACCATCCATGTCCAG-3'  |
| <i>PtrWRKY63</i>                                                                            | 5'-TAGTCCTTGGAGTGAAGTC-3'   | 5'-GCATCTGTAGTATCCTCTTG-3'   |
| <i>PtrWRKY64</i>                                                                            | 5'-ACAGTAGTCCTAGGAGTG-3'    | 5'-GCATCTGTAGTATCCTCTTG-3'   |
| <i>PtrWRKY65</i>                                                                            | 5'-CGAAGTAAGAAGGCCATGC-3'   | 5'-TTGTGGGATCTAGAAGGAG-3'    |
| <i>PtrWRKY69</i>                                                                            | 5'-AGATGGCTTCCACTTCCTC-3'   | 5'-ATAGTATCCTCTGGGGTAAG-3'   |
| <i>PtrWRKY70</i>                                                                            | 5'-AATCCAAGGAGCTACTAC-3'    | 5'-GTTACCATTGTTGTTGTGG-3'    |
| <i>PtrWRKY71</i>                                                                            | 5'-AGAAGGCAGTGAAGAATAGC-3'  | 5'-CCAGAAGGGAAGGTGATAGC-3'   |

|                   |                               |                              |
|-------------------|-------------------------------|------------------------------|
| <i>PtrWRKY73</i>  | 5'-ATGGCTGCTTCTTCAGGGAGC-3'   | 5'-ACTACTCTTCCAGTTCAAACCC-3' |
| <i>PtrWRKY74</i>  | 5'-AAGATGGCTGGGACAGAACG-3'    | 5'-GTAGCTCCTT GGATTTGG-3'    |
| <i>PtrWRKY75</i>  | 5'-ATTGGGTCTCCAACAGAG-3'      | 5'-ATCGGTAATAGCTCCTCGG-3'    |
| <i>PtrWRKY76</i>  | 5'-GTCATCCACAAGATCATT-3'      | 5'-CTCAGTTTCCTCCTCTTTG-3'    |
| <i>PtrWRKY77</i>  | 5'-ATGTCAGGACTGAAGCTG-3'      | 5'-CGATACTCCTTTGAACCT-3'     |
| <i>PtrWRKY78</i>  | 5'-GGAAGCTCCCATGATTACTG-3'    | 5'-CATTGCAGCTGGAGGTAGAG-3'   |
| <i>PtrWRKY80</i>  | 5'-CTAGTAGAATCTGTAACG-3'      | 5'-GTAGTAACTTCTTGAAAC-3'     |
| <i>PtrWRKY83</i>  | 5'-TTGCTGCTGATCCTAACTTC-3'    | 5'-CATTGCTATTGCTGTTGCTG-3'   |
| <i>PtrWRKY84</i>  | 5'-TGCTCCATGACTGTAGGATG-3'    | 5'-TAAGAGCATTGTTGCTGCAG-3'   |
| <i>PtrWRKY85</i>  | 5'-CTTCTATCTTCTCCTCTTCG-3'    | 5'-GTACTTCTCCACCTAAACC-3'    |
| <i>PtrWRKY86</i>  | 5'-CAGAGGTGTTGAATCAGC-3'      | 5'-GCAACGATAGTAACTCCTAGG-3'  |
| <i>PtrWRKY87</i>  | 5'-CGCCTTCCAAGAAACCTAAG-3'    | 5'-GGAGGAAGATGGTGAAGTAGG-3'  |
| <i>PtrWRKY88</i>  | 5'-GCATGCAAATGGAGTGAAG-3'     | 5'-TGGGCTGTTCTTGACTGAC-3'    |
| <i>PtrWRKY89</i>  | 5'-TCCAACGATCCACAATAACC-3'    | 5'-TAAAACATCACCGCCGTCTC-3'   |
| <i>PtrWRKY91</i>  | 5'-TGCTAGTCACATGACTCCTCC-3'   | 5'-AATTTGATCAACGCATTCCAG-3'  |
| <i>PtrWRKY93</i>  | 5'-TTCCAGGATCCATCAATCG-3'     | 5'-CGGAACCTTGATACTGCTGGTG-3' |
| <i>PtrWRKY95</i>  | 5'-TTGTTGGGTCTGGAATTGAGG-3'   | 5'-ACACCGATAGTAGCTTCTGG-3'   |
| <i>PtoPR1.2</i>   | 5'-TATAATAATCCCTCTATCCC-3'    | 5'-CTAGTAAGGACGCTGGCCAACG-3' |
| <i>PtoPR2.3</i>   | 5'-CAAAGGATTGCTTCCAGTCAAGC-3' | 5'-TCAAGAAGGGCATCGAAGAGG-3'  |
| <i>PtoPR2.6</i>   | 5'-ATGGGAGGTTATTCATCTAGAC-3'  | 5'-AATTGGCGGATGCTATTGCG-3'   |
| <i>PtoPR5.1</i>   | 5'-ATGGCAACTTGCACGCATG-3'     | 5'-GACACCAGAGGCACAGTCAG-3'   |
| <i>PtoPR5.2</i>   | 5'-CTGCTCCTTCTCTTCGTAAC-3'    | 5'-CTTCCACTGCCTGATTATC-3'    |
| <i>PtoPR5.3</i>   | 5'-CACTTCTCTTGCTGCTTCTCC-3'   | 5'-CATTCAACTTGACCTGATCCG-3'  |
| <i>PtoPR5.4</i>   | 5'-TTCCCCACTCTTATTTCAGC-3'    | 5'-CCCATCTACAAGACTAACATCG-3' |
| <i>PtoPR5.12</i>  | 5'-TCTGGCCAGGAAGTCTAACG-3'    | 5'-TTCTGCTAACGATGCTGGTGGG-3' |
| <i>Pto18S</i>     | 5'-GGCATGGAAGGTGATGCAGATC-3'  | 5'-CTGTGTCAAACAAGAAGTGTCC-3' |
| <i>PtoSID2</i>    | 5'-AGTTCAACACTTGTATGCAC-3'    | 5'-TTGATGATTCTGAGTTCTC-3'    |
| <i>PtoMYB44.1</i> | 5'-GAGTTTATGTCGGTGATGC-3'     | 5'-GTTTCCTTTCTACCCTGTCC-3'   |
| <i>PtoMYB44.2</i> | 5'-CTGGCTCAAGTTCTGGATCC-3'    | 5'-TCGTTTAACCACAGCGTTCC-3'   |
| <i>PtoNPR1.1</i>  | 5'-GTTGACCTAAATGAGACACC-3'    | 5'-TAATCTCAGCCTTGTCCTTG-3'   |
| <i>PtoAOS7</i>    | 5'-CTATAACCAAGGCAGAGACGAG-3'  | 5'-GCTGAAGGCATGAAAGTACCTG-3' |
| <i>PtoJAZ10</i>   | 5'-AGAGCAGCAGCTGTTGAACTC-3'   | 5'-GAGGGAGAGCAGGAAATGAAGG-3' |

**Supplementary Table S3.** Primers for quantitative real-time RT-PCR (qRT-PCR) and semi-qRT-PCR in this study. F and R represented the forward and reverse primers, respectively.

*Ptr* and *Pto* meant *P. trichocarpa* and *P. tomentosa* Carr., respectively.

Supplemental Table S4. The number of various *cis*-acting elements in WRKY promoters

|                | SA          | MeJA        | Fungi   |           | Wound   |            | Cold   | Salt/Drought |        | W-box   |
|----------------|-------------|-------------|---------|-----------|---------|------------|--------|--------------|--------|---------|
|                | TCA-element | CGTCA-motif | EIRE    | ELI-box3  | Box-S   | WUN-motif  | LTR    | ABRE         | MBS    |         |
| motif sequence | CCATCTTTTT  | CGTCA       | TTCGACC | AAACCAATT | AGCCACC | TCATTACGAA | CCGAAA | YACGTGGC     | TAACTG | TTGACCY |
| WRKY1          | 1           | 0           | 0       | 0         | 0       | 0          | 0      | 0            | 0      | 0       |
| WRKY2          | 3           | 0           | 0       | 0         | 0       | 0          | 0      | 0            | 1      | 0       |
| WRKY3          | 1           | 0           | 0       | 0         | 0       | 1          | 0      | 0            | 0      | 0       |
| WRKY4          | 1           | 1           | 0       | 1         | 0       | 0          | 0      | 0            | 1      | 2       |
| WRKY5          | 0           | 1           | 0       | 0         | 0       | 0          | 0      | 0            | 1      | 3       |
| WRKY6          | 1           | 3           | 1       | 0         | 0       | 0          | 0      | 0            | 2      | 0       |
| WRKY7          | 1           | 4           | 0       | 0         | 0       | 1          | 0      | 0            | 1      | 4       |
| WRKY8          | 1           | 0           | 0       | 0         | 0       | 0          | 0      | 0            | 1      | 0       |
| WRKY9          | 1           | 0           | 0       | 0         | 0       | 1          | 1      | 0            | 1      | 1       |
| WRKY10         | 1           | 2           | 0       | 0         | 0       | 0          | 1      | 0            | 1      | 1       |
| WRKY11         | 1           | 0           | 0       | 0         | 0       | 0          | 0      | 0            | 0      | 2       |
| WRKY12         | 0           | 1           | 0       | 0         | 0       | 0          | 0      | 0            | 1      | 0       |
| WRKY13         | 0           | 0           | 0       | 0         | 0       | 0          | 1      | 0            | 0      | 1       |
| WRKY14         | 1           | 0           | 0       | 0         | 0       | 0          | 0      | 0            | 0      | 1       |
| WRKY15         | 0           | 0           | 0       | 0         | 0       | 0          | 5      | 0            | 0      | 2       |
| WRKY16         | 1           | 0           | 0       | 0         | 0       | 0          | 2      | 0            | 1      | 2       |
| WRKY17         | 0           | 0           | 0       | 0         | 0       | 1          | 0      | 0            | 0      | 1       |
| WRKY18         | 0           | 0           | 0       | 0         | 0       | 0          | 0      | 0            | 2      | 5       |
| WRKY19         | 0           | 2           | 0       | 0         | 0       | 0          | 1      | 0            | 0      | 1       |
| WRKY20         | 0           | 0           | 0       | 0         | 0       | 0          | 0      | 0            | 0      | 0       |
| WRKY21         | 1           | 1           | 0       | 0         | 0       | 0          | 2      | 0            | 2      | 1       |
| WRKY22         | 1           | 0           | 0       | 0         | 0       | 0          | 1      | 0            | 0      | 0       |
| WRKY23         | 0           | 2           | 1       | 0         | 1       | 1          | 0      | 0            | 0      | 3       |
| WRKY24         | 0           | 0           | 0       | 0         | 0       | 0          | 1      | 0            | 0      | 2       |
| WRKY25         | 0           | 1           | 0       | 0         | 0       | 0          | 0      | 0            | 0      | 1       |
| WRKY26         | 1           | 1           | 0       | 0         | 0       | 0          | 0      | 0            | 0      | 0       |
| WRKY27         | 0           | 1           | 0       | 0         | 1       | 0          | 0      | 0            | 0      | 0       |
| WRKY28         | 2           | 0           | 0       | 0         | 0       | 1          | 0      | 0            | 0      | 1       |
| WRKY29         | 5           | 2           | 0       | 0         | 0       | 0          | 0      | 0            | 1      | 0       |
| WRKY30         | 0           | 1           | 1       | 0         | 0       | 0          | 0      | 0            | 0      | 0       |
| WRKY31         | 2           | 0           | 0       | 0         | 0       | 1          | 0      | 0            | 1      | 1       |
| WRKY32         | 0           | 3           | 0       | 0         | 0       | 0          | 0      | 1            | 0      | 2       |
| WRKY33         | 1           | 0           | 0       | 0         | 0       | 0          | 0      | 1            | 1      | 1       |
| WRKY34         | 0           | 2           | 0       | 0         | 0       | 0          | 0      | 1            | 2      | 3       |
| WRKY35         | 1           | 1           | 0       | 0         | 0       | 0          | 1      | 1            | 0      | 0       |
| WRKY36         | 2           | 1           | 0       | 0         | 0       | 0          | 1      | 1            | 4      | 1       |
| WRKY37         | 1           | 0           | 0       | 0         | 0       | 0          | 0      | 0            | 0      | 0       |
| WRKY38         | 3           | 1           | 0       | 0         | 0       | 0          | 0      | 1            | 1      | 0       |
| WRKY39         | 3           | 0           | 0       | 0         | 1       | 0          | 1      | 2            | 0      | 1       |
| WRKY40         | 2           | 0           | 0       | 0         | 0       | 0          | 0      | 1            | 0      | 0       |
| WRKY41         | 2           | 0           | 0       | 0         | 0       | 0          | 0      | 1            | 2      | 0       |
| WRKY42         | 2           | 4           | 0       | 0         | 0       | 0          | 0      | 3            | 2      | 1       |

|        |   |   |   |   |   |   |   |   |   |    |
|--------|---|---|---|---|---|---|---|---|---|----|
| WRKY43 | 1 | 1 | 0 | 0 | 0 | 0 | 0 | 0 | 3 | 1  |
| WRKY44 | 0 | 1 | 0 | 0 | 0 | 0 | 0 | 2 | 0 | 1  |
| WRKY45 | 1 | 0 | 0 | 0 | 0 | 0 | 1 | 0 | 2 | 0  |
| WRKY46 | 3 | 1 | 0 | 0 | 1 | 0 | 1 | 4 | 4 | 0  |
| WRKY47 | 0 | 0 | 0 | 0 | 0 | 0 | 0 | 0 | 0 | 0  |
| WRKY48 | 0 | 1 | 0 | 0 | 0 | 0 | 0 | 1 | 3 | 0  |
| WRKY49 | 0 | 3 | 0 | 0 | 0 | 0 | 0 | 0 | 1 | 1  |
| WRKY50 | 2 | 3 | 0 | 0 | 0 | 0 | 3 | 0 | 5 | 2  |
| WRKY51 | 0 | 4 | 0 | 0 | 0 | 1 | 0 | 6 | 4 | 1  |
| WRKY52 | 3 | 2 | 0 | 0 | 0 | 0 | 0 | 2 | 3 | 0  |
| WRKY53 | 0 | 1 | 0 | 0 | 0 | 0 | 1 | 1 | 3 | 0  |
| WRKY54 | 0 | 0 | 0 | 1 | 0 | 0 | 1 | 0 | 1 | 2  |
| WRKY55 | 2 | 0 | 0 | 0 | 0 | 0 | 1 | 1 | 0 | 0  |
| WRKY56 | 1 | 1 | 0 | 0 | 0 | 0 | 0 | 1 | 2 | 1  |
| WRKY57 | 1 | 3 | 1 | 0 | 0 | 0 | 0 | 1 | 4 | 1  |
| WRKY58 | 3 | 0 | 0 | 0 | 1 | 1 | 3 | 4 | 2 | 2  |
| WRKY59 | 1 | 2 | 0 | 0 | 0 | 0 | 0 | 0 | 1 | 2  |
| WRKY60 | 4 | 1 | 0 | 0 | 1 | 0 | 1 | 3 | 3 | 7  |
| WRKY61 | 1 | 1 | 0 | 0 | 0 | 1 | 2 | 2 | 1 | 4  |
| WRKY62 | 1 | 3 | 0 | 1 | 0 | 0 | 1 | 1 | 1 | 2  |
| WRKY63 | 0 | 2 | 0 | 0 | 0 | 0 | 0 | 2 | 1 | 0  |
| WRKY64 | 2 | 2 | 0 | 0 | 1 | 0 | 0 | 1 | 2 | 2  |
| WRKY65 | 1 | 3 | 0 | 1 | 0 | 0 | 5 | 1 | 2 | 1  |
| WRKY66 | 0 | 3 | 0 | 0 | 0 | 0 | 0 | 0 | 1 | 0  |
| WRKY67 | 1 | 1 | 2 | 0 | 2 | 0 | 0 | 2 | 5 | 2  |
| WRKY68 | 0 | 1 | 0 | 0 | 0 | 1 | 1 | 0 | 3 | 1  |
| WRKY69 | 2 | 1 | 0 | 0 | 0 | 0 | 0 | 1 | 1 | 0  |
| WRKY70 | 2 | 1 | 0 | 0 | 0 | 0 | 0 | 0 | 4 | 1  |
| WRKY71 | 3 | 1 | 0 | 0 | 0 | 0 | 0 | 4 | 2 | 2  |
| WRKY72 | 2 | 1 | 0 | 0 | 0 | 0 | 0 | 0 | 3 | 3  |
| WRKY73 | 1 | 2 | 0 | 0 | 0 | 0 | 1 | 2 | 3 | 2  |
| WRKY74 | 2 | 0 | 0 | 1 | 2 | 0 | 1 | 3 | 2 | 3  |
| WRKY75 | 2 | 0 | 0 | 1 | 0 | 1 | 1 | 2 | 1 | 1  |
| WRKY76 | 2 | 0 | 0 | 0 | 0 | 0 | 0 | 0 | 4 | 2  |
| WRKY77 | 0 | 2 | 0 | 0 | 0 | 0 | 0 | 1 | 2 | 11 |
| WRKY78 | 3 | 6 | 0 | 0 | 0 | 0 | 0 | 3 | 4 | 3  |
| WRKY79 | 3 | 1 | 0 | 0 | 0 | 0 | 1 | 2 | 0 | 1  |
| WRKY80 | 0 | 2 | 0 | 1 | 1 | 0 | 0 | 0 | 2 | 2  |
| WRKY81 | 3 | 0 | 0 | 0 | 0 | 0 | 1 | 3 | 1 | 3  |
| WRKY82 | 0 | 2 | 1 | 0 | 1 | 1 | 1 | 3 | 3 | 3  |
| WRKY83 | 3 | 4 | 0 | 0 | 0 | 0 | 0 | 1 | 2 | 1  |
| WRKY84 | 0 | 3 | 0 | 0 | 0 | 0 | 0 | 2 | 2 | 1  |
| WRKY85 | 1 | 3 | 1 | 0 | 0 | 0 | 0 | 1 | 3 | 5  |
| WRKY86 | 1 | 1 | 0 | 1 | 0 | 0 | 0 | 5 | 2 | 0  |
| WRKY87 | 3 | 1 | 2 | 0 | 1 | 0 | 2 | 2 | 1 | 1  |
| WRKY88 | 4 | 3 | 0 | 0 | 0 | 0 | 0 | 5 | 0 | 1  |

|         |   |   |   |   |   |   |   |   |   |   |
|---------|---|---|---|---|---|---|---|---|---|---|
| WRKY89  | 0 | 4 | 0 | 0 | 0 | 0 | 1 | 0 | 3 | 2 |
| WRKY90  | 0 | 1 | 0 | 1 | 0 | 0 | 0 | 0 | 0 | 1 |
| WRKY91  | 3 | 2 | 0 | 0 | 0 | 0 | 0 | 0 | 2 | 2 |
| WRKY92  | 2 | 4 | 0 | 0 | 0 | 0 | 2 | 1 | 0 | 0 |
| WRKY93  | 3 | 1 | 0 | 0 | 0 | 0 | 1 | 0 | 2 | 0 |
| WRKY94  | 0 | 0 | 0 | 0 | 0 | 0 | 1 | 1 | 1 | 0 |
| WRKY95  | 0 | 0 | 0 | 0 | 0 | 0 | 0 | 1 | 0 | 3 |
| WRKY96  | 3 | 0 | 0 | 0 | 0 | 0 | 0 | 0 | 1 | 1 |
| WRKY97  | 3 | 0 | 0 | 0 | 0 | 0 | 0 | 1 | 0 | 0 |
| WRKY98  | 0 | 1 | 0 | 0 | 0 | 0 | 0 | 1 | 2 | 0 |
| WRKY99  | 2 | 2 | 0 | 0 | 0 | 0 | 1 | 1 | 0 | 1 |
| WRKY100 | 0 | 0 | 0 | 0 | 0 | 0 | 0 | 0 | 1 | 3 |

**Supplementary Table S4.** Various *cis*-acting elements responsive to tresses in WRKY promoters.

The figures represented the number of each kind of elements.

Supplemental Table S5. Results of DGE analysis

| gene name        | sequence ID<br>VISION 3.0 | sequence ID<br>VISION 2.0 | log2 Ratio<br>(SA/WT) | log2 Ratio<br>(MeJA/CK) | log2 Ratio<br>(Mb/CK) | log2 Ratio<br>(WOUND/CK) | log2 Ratio<br>(COLD/CK) | log2 Ratio<br>(SALT/CK) |
|------------------|---------------------------|---------------------------|-----------------------|-------------------------|-----------------------|--------------------------|-------------------------|-------------------------|
| <i>PtrWRKY1</i>  | Potri.014G164300          | POPTR_0014s16220.1        | 1.39                  | 1.19                    | 1.41                  | N/A                      | N/A                     | N/A                     |
| <i>PtrWRKY2</i>  | Potri.011G169300          | POPTR_0011s17230.1        | -1.14                 | -0.22                   | -0.05                 | -1.05                    | -0.69                   | 0.20                    |
| <i>PtrWRKY3</i>  | Potri.008G091900          | POPTR_0008s09140.1        | 2.07                  | 1.08                    | 2.37                  | 1.71                     | -0.21                   | 1.50                    |
| <i>PtrWRKY4</i>  | Potri.017G088300          | POPTR_0017s12430.1        | 0.14                  | 0.47                    | 0.39                  | 0.29                     | -0.13                   | 1.26                    |
| <i>PtrWRKY5</i>  | Potri.002G221600          | POPTR_0002s22180.1        | 1.86                  | 2.00                    | 2.08                  | 0.62                     | 1.45                    | 2.91                    |
| <i>PtrWRKY6</i>  | Potri.004G007500          | POPTR_0004s00890.1        | 3.63                  | 5.26                    | 7.63                  | 6.51                     | 2.14                    | 6.67                    |
| <i>PtrWRKY7</i>  | Potri.002G123300          | POPTR_0002s12480.1        | 1.37                  | 0.43                    | 0.72                  | 0.77                     | 0.27                    | 2.56                    |
| <i>PtrWRKY11</i> | Potri.018G008500          | POPTR_0018s03450.1        | 2.85                  | 1.56                    | 3.04                  | 2.37                     | 2.10                    | 2.63                    |
| <i>PtrWRKY15</i> | Potri.005G141400          | POPTR_0005s18490.1        | 1.98                  | 1.50                    | 1.28                  | 1.21                     | 0.23                    | 2.62                    |
| <i>PtrWRKY16</i> | Potri.010G163000          | POPTR_0010s17040.1        | 0.63                  | 0.93                    | 1.51                  | 1.42                     | 0.21                    | 1.63                    |
| <i>PtrWRKY17</i> | Potri.006G072400          | POPTR_0006s07170.1        | 0.64                  | 0.40                    | 1.46                  | 0.10                     | -1.33                   | 0.84                    |
| <i>PtrWRKY18</i> | Potri.006G263600          | POPTR_0006s27950.1        | 7.78                  | 5.77                    | 9.58                  | 6.83                     | 4.59                    | 6.42                    |
| <i>PtrWRKY20</i> | Potri.011G087900          | POPTR_0011s09030.1        | 1.27                  | 1.21                    | 1.25                  | 0.53                     | 0.81                    | 1.11                    |
| <i>PtrWRKY21</i> | Potri.005G219500          | POPTR_0005s24100.1        | 0.96                  | 0.12                    | 1.35                  | -0.24                    | 1.36                    | 0.57                    |
| <i>PtrWRKY22</i> | Potri.002G164400          | POPTR_0002s16590.1        | -0.80                 | -0.35                   | 1.22                  | 2.79                     | 1.04                    | 0.95                    |
| <i>PtrWRKY24</i> | Potri.018G139300          | POPTR_0018s13600.1        | -0.29                 | -0.78                   | 1.34                  | -0.26                    | -0.89                   | 0.14                    |
| <i>PtrWRKY28</i> | Potri.002G059100          | POPTR_0002s06000.1        | 0.31                  | 1.61                    | 1.82                  | -0.53                    | 0.91                    | 3.06                    |
| <i>PtrWRKY30</i> | Potri.012G031700          | POPTR_0012s01380.1        | 10.55                 | 11.50                   | 12.14                 | 9.97                     | 9.40                    | 11.90                   |
| <i>PtrWRKY31</i> | Potri.007G047400          | POPTR_0007s10670.1        | 1.84                  | 1.23                    | 1.63                  | 2.79                     | 0.23                    | 0.14                    |
| <i>PtrWRKY32</i> | Potri.018G107000          | POPTR_0018s11630.1        | 1.37                  | 0.84                    | 0.62                  | 0.57                     | 0.81                    | 0.85                    |
| <i>PtrWRKY33</i> | Potri.016G128300          | POPTR_0016s13600.1        | 4.26                  | 4.51                    | 8.00                  | 4.53                     | 2.10                    | 4.75                    |
| <i>PtrWRKY35</i> | Potri.018G019800          | POPTR_0018s02470.1        | 5.81                  | 3.33                    | 5.74                  | 12.06                    | 8.62                    | 14.08                   |
| <i>PtrWRKY36</i> | Potri.001G361600          | POPTR_0001s37260.1        | 0.92                  | 0.42                    | 0.11                  | -0.30                    | 0.41                    | 1.20                    |
| <i>PtrWRKY40</i> | Potri.001G044500          | POPTR_0001s03620.1        | 1.77                  | 0.75                    | 4.04                  | 3.91                     | 2.15                    | 4.77                    |
| <i>PtrWRKY41</i> | Potri.001G092900          | POPTR_0001s10490.1        | 5.78                  | 5.41                    | 7.58                  | 2.53                     | 1.23                    | 4.72                    |
| <i>PtrWRKY42</i> | Potri.014G111900          | POPTR_0014s10750.1        | 3.43                  | 4.28                    | 4.52                  | 1.90                     | 0.64                    | 3.86                    |
| <i>PtrWRKY47</i> | Potri.002G228400          | POPTR_0002s21330.1        | 1.37                  | 1.93                    | 4.05                  | 6.18                     | 4.44                    | 1.95                    |
| <i>PtrWRKY48</i> | Potri.008G103300          | POPTR_0008s10280.1        | 0.63                  | 1.44                    | 1.72                  | 1.67                     | 2.04                    | 3.18                    |
| <i>PtrWRKY49</i> | Potri.006G087000          | POPTR_0006s08730.1        | 2.60                  | 1.03                    | 1.46                  | -1.21                    | -0.77                   | 1.05                    |
| <i>PtrWRKY50</i> | Potri.006G224100          | POPTR_0006s24050.1        | 4.30                  | 4.12                    | 7.35                  | 2.79                     | 1.81                    | 5.46                    |
| <i>PtrWRKY51</i> | Potri.005G085200          | POPTR_0005s08720.1        | 16.28                 | 12.70                   | 16.21                 | 12.70                    | 9.26                    | 14.63                   |
| <i>PtrWRKY52</i> | Potri.014G119800          | POPTR_0014s11490.1        | 2.14                  | 0.78                    | 1.51                  | 3.93                     | 2.89                    | 1.18                    |
| <i>PtrWRKY53</i> | Potri.003G138600          | POPTR_0003s13840.1        | 4.80                  | 4.73                    | 9.19                  | 5.69                     | 3.64                    | 4.08                    |
| <i>PtrWRKY54</i> | Potri.013G090300          | POPTR_0013s09470.1        | 4.91                  | 2.12                    | 5.72                  | 2.79                     | 1.81                    | 5.63                    |
| <i>PtrWRKY59</i> | Potri.002G195300          | POPTR_0002s19630.1        | 1.59                  | 1.31                    | 1.19                  | 0.97                     | 1.35                    | 1.22                    |
| <i>PtrWRKY60</i> | Potri.018G019700          | POPTR_0018s02480.1        | 15.15                 | 8.49                    | 12.97                 | 9.83                     | 8.86                    | 14.32                   |
| <i>PtrWRKY61</i> | Potri.015G064100          | POPTR_0015s07530.1        | 9.36                  | 10.75                   | 12.26                 | 9.36                     | N/A                     | 9.29                    |
| <i>PtrWRKY62</i> | Potri.016G137900          | POPTR_0016s14490.1        | 5.29                  | 3.72                    | 5.32                  | 1.92                     | 1.04                    | 3.50                    |
| <i>PtrWRKY63</i> | Potri.002G168700          | POPTR_0002s17010.1        | 2.40                  | 2.58                    | 6.22                  | 3.08                     | 1.60                    | 2.53                    |
| <i>PtrWRKY64</i> | Potri.014G096200          | POPTR_0014s09190.1        | 2.51                  | 2.43                    | 6.34                  | 1.69                     | 0.28                    | 1.95                    |
| <i>PtrWRKY65</i> | Potri.011G070100          | POPTR_0011s06990.1        | 3.26                  | 2.27                    | 2.14                  | 0.13                     | -0.94                   | -0.71                   |
| <i>PtrWRKY69</i> | Potri.004G060900          | POPTR_0004s05920.1        | 2.22                  | 2.86                    | 3.82                  | 1.08                     | -0.36                   | 0.55                    |
| <i>PtrWRKY70</i> | Potri.019G123500          | POPTR_0019s14460.1        | 3.57                  | 2.42                    | 3.96                  | 3.38                     | 2.14                    | 5.18                    |
| <i>PtrWRKY71</i> | Potri.005G203200          | POPTR_0005s22480.1        | -2.17                 | 0.31                    | 1.24                  | 1.79                     | 1.71                    | 1.62                    |

|                  |                  |                    |       |        |        |       |      |       |
|------------------|------------------|--------------------|-------|--------|--------|-------|------|-------|
| <i>PtrWRKY73</i> | Potri.013G153400 | POPTR_0013s14960.1 | 3.51  | 2.84   | 5.29   | 3.75  | 1.97 | 5.17  |
| <i>PtrWRKY74</i> | Potri.006G105300 | POPTR_0006s10600.1 | 1.46  | 2.67   | 4.25   | 1.62  | 0.45 | 1.01  |
| <i>PtrWRKY75</i> | Potri.T043800    | POPTR_0017s09750.1 | 12.13 | 10.61  | 12.51  | N/A   | N/A  | 10.31 |
| <i>PtrWRKY76</i> | Potri.013G042600 | POPTR_0013s03990.1 | 1.05  | 1.36   | 1.20   | -0.25 | 0.47 | 2.26  |
| <i>PtrWRKY77</i> | Potri.003G182200 | POPTR_0003s18060.1 | 1.37  | 0.99   | 3.72   | 5.86  | 3.85 | 3.36  |
| <i>PtrWRKY78</i> | Potri.011G007800 | POPTR_0021s00280.1 | 4.05  | 5.17   | 7.23   | 7.45  | 4.23 | 6.24  |
| <i>PtrWRKY80</i> | Potri.015G099200 | POPTR_0015s11130.1 | 10.02 | N/A    | 11.43  | N/A   | N/A  | 13.18 |
| <i>PtrWRKY83</i> | Potri.014G155100 | POPTR_0014s15320.1 | 2.43  | 1.12   | 1.58   | 3.95  | 1.38 | 1.26  |
| <i>PtrWRKY84</i> | Potri.002G186600 | POPTR_0002s18770.1 | 1.63  | 4.51   | 4.36   | 2.08  | 0.23 | 2.55  |
| <i>PtrWRKY85</i> | Potri.010G147700 | POPTR_0010s15750.1 | 0.92  | 2.34   | 3.72   | 3.24  | 2.45 | 2.76  |
| <i>PtrWRKY86</i> | Potri.002G193000 | POPTR_0002s19390.1 | 2.70  | 1.71   | 1.33   | 3.01  | 1.23 | 5.23  |
| <i>PtrWRKY87</i> | Potri.016G099900 | POPTR_0016s10610.1 | -3.65 | -11.88 | -11.88 | -3.49 | 0.99 | -1.24 |
| <i>PtrWRKY88</i> | Potri.007G079800 | POPTR_0007s06720.1 | 13.97 | 10.00  | 13.54  | 9.34  | N/A  | 12.28 |
| <i>PtrWRKY89</i> | Potri.006G109100 | POPTR_0006s10950.1 | 8.60  | 4.19   | 6.31   | 3.96  | 2.60 | 4.64  |
| <i>PtrWRKY91</i> | Potri.008G094000 | POPTR_0008s09360.1 | 1.46  | 2.62   | 3.31   | 2.62  | 0.23 | 1.14  |
| <i>PtrWRKY93</i> | Potri.001G352400 | POPTR_0001s34520.1 | 2.86  | 4.93   | 5.50   | 2.21  | 1.23 | 7.08  |
| <i>PtrWRKY95</i> | Potri.003G169100 | POPTR_0003s16750.1 | 13.79 | 13.92  | 14.24  | 13.53 | 9.64 | 16.99 |

**Supplementary Table S5.** Results of DGE analysis. The common names and gene IDs of *PtrWRKY* genes from different visions of Phytozome. The log<sub>2</sub> expression values of salicylic acid (SA), Methyl Jasmonate (MeJA), *Marssonina brunnea* f.sp. *multigermtubi* (Mb) inoculation and wounding, cold, salinity treatments compared with CK were listed. N/A represented that mRNA transcripts of *WRKY* genes were not detected. Minus represented down-regulation of the gene.
